# Supplementary material for: Pathogenic adaptations of Colletotrichum fungi revealed by genome wide gene family evolutionary analyses
Source: PubMed Central journal article supplement (PMC5915685; doi:10.1371/journal.pone.0196303), 2018-04-24

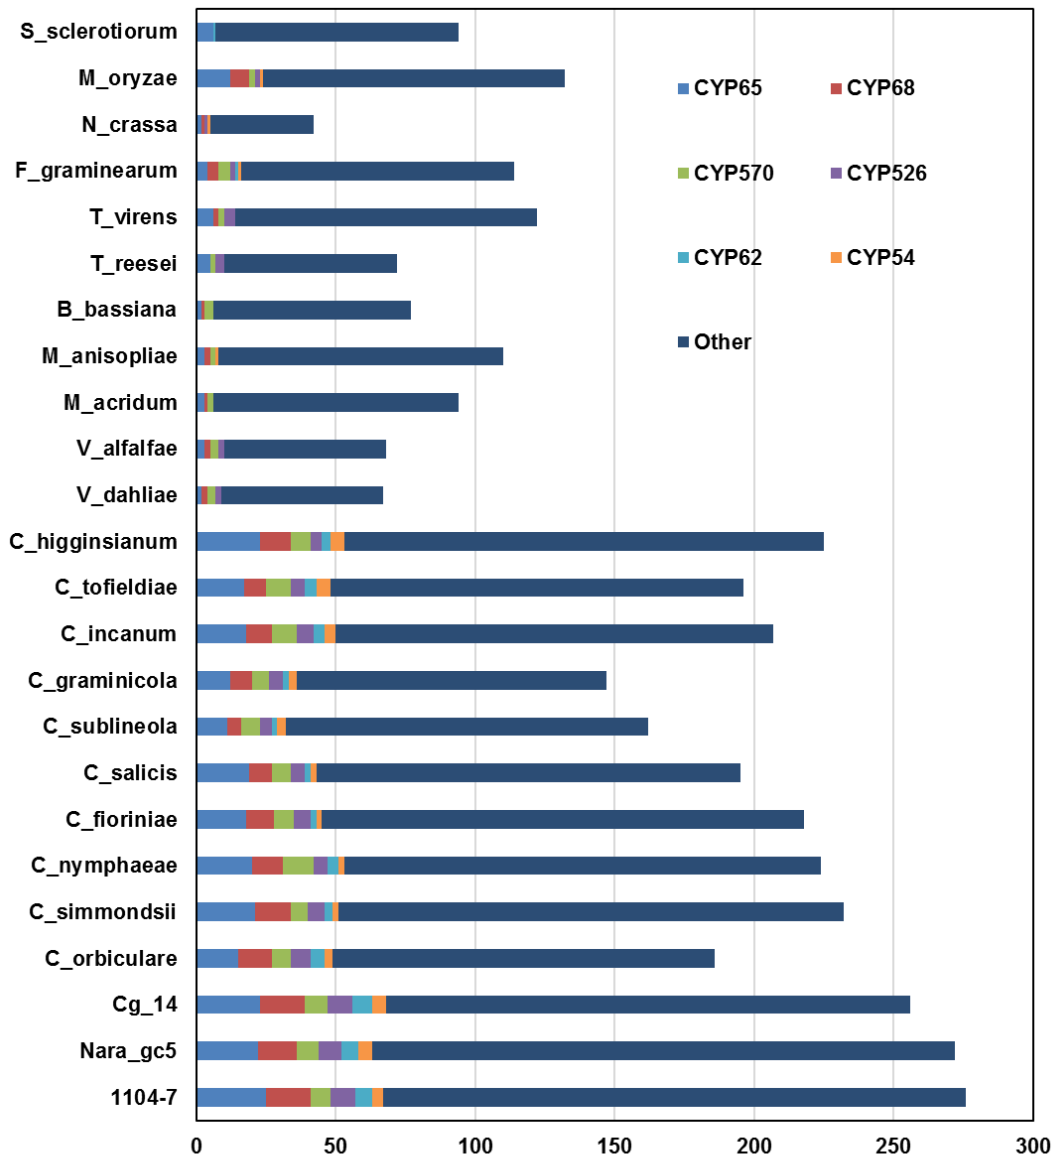

Supplement: pone.0196303.s005.pdf [file pone.0196303.s005.pdf]
